# Supplementary material for: Removal of Misincorporated Ribonucleotides from Prokaryotic Genomes: An Unexpected Role for Nucleotide Excision Repair
Source: PubMed Central journal article supplement (PMC3820734; doi:10.1371/journal.pgen.1003878), 2013-11-07
Supplement: pgen.1003878.s001.pdf [file pgen.1003878.s001.pdf]

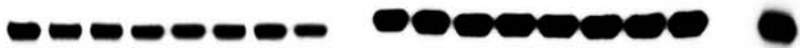

|                                               |                                          |                                               |                                          |                 |
|-----------------------------------------------|------------------------------------------|-----------------------------------------------|------------------------------------------|-----------------|
| $\frac{[u/T \ a/T \ a/A \ u/A]}{RNase \ HII}$ | $\frac{[u/T \ a/T \ a/A \ u/A]}{UvrABC}$ | $\frac{[u/T \ a/T \ a/A \ u/A]}{RNase \ HII}$ | $\frac{[u/T \ a/T \ a/A \ u/A]}{UvrABC}$ | $\frac{a/T}{-}$ |
|-----------------------------------------------|------------------------------------------|-----------------------------------------------|------------------------------------------|-----------------|

5' \* - ATXGA - X = T or A  
 3' - TAYCT - y = u or a

5' \* - AAXGA - X = T or A  
 3' - TAYCT - y = u or a
