# Supplementary material for: Removal of Misincorporated Ribonucleotides from Prokaryotic Genomes: An Unexpected Role for Nucleotide Excision Repair
Source: PubMed Central journal article supplement (PMC3820734; doi:10.1371/journal.pgen.1003878), 2013-11-07
Supplement: pgen.1003878.s002.pdf [file pgen.1003878.s002.pdf]

**Table S1: Spectrum of spontaneous mutations generated in the *rpoB* gene in a *recA730 lexA(Def) ΔdinB ΔumuDC mutL<sup>+/-</sup> rnhB<sup>+/-</sup>* strains in the presence of *umuC\_Y11A*<sup>a</sup>.**

| Position <sup>b</sup> | bp change     | <i>rnhB<sup>+</sup> mutL</i> | <i>ΔrnhB mutL</i> | <i>rnhB<sup>+</sup> mutL<sup>+</sup></i> | <i>ΔrnhB mutL<sup>+</sup></i> |
|-----------------------|---------------|------------------------------|-------------------|------------------------------------------|-------------------------------|
| 1525                  | AT→CG         |                              |                   | 2                                        |                               |
| 1527                  | CG→AT         |                              |                   | 2                                        |                               |
|                       | CG→GC         |                              |                   | 26                                       |                               |
| 1532                  | AT→CG         |                              |                   | 2                                        | 2                             |
| 1532                  | AT→GC         | 23                           | 11                |                                          | 6                             |
| 1534                  | AT→GC         | 151                          | 85                | 2                                        | 18                            |
| 1535                  | CG→TA         |                              | 2                 |                                          |                               |
| 1535                  | CG→TA         | 88                           | 4                 | 7                                        |                               |
| 1536                  | AT→TA         |                              |                   | 2                                        |                               |
| 1537                  | CG→TA         | 1                            |                   |                                          |                               |
| 1537                  | CG→AT         |                              |                   | 7                                        |                               |
| 1538                  | AT→TA         |                              | 2                 | 72                                       | 30                            |
| 1538                  | AT→GC         | 15                           | 41                |                                          |                               |
| 1546                  | CG→AT         | 1                            | 3                 | 19                                       | 22                            |
| 1546                  | CG→TA         | 33                           | 56                |                                          | 6                             |
| 1547                  | AT→TA         |                              |                   | 10                                       | 10                            |
| 1547                  | AT→GC         | 11                           | 54                | 17                                       | 10                            |
| 1576                  | CG→AT         | 1                            | 3                 | 7                                        | 38                            |
| 1577                  | AT→TA         | 1                            | 20                | 17                                       | 36                            |
| 1578                  | CG→AT         |                              |                   | 5                                        |                               |
| 1578                  | CG→GC         |                              |                   | 24                                       |                               |
| 1592                  | CG→AT         |                              |                   |                                          | 6                             |
| 1592                  | CG→GC         |                              |                   | 5                                        | 4                             |
| 1592                  | CG→TA         | 17                           | 21                | 7                                        |                               |
| 1598                  | AT→TA         |                              |                   | 22                                       | 4                             |
| 1600                  | CG→TA         | 5                            |                   |                                          |                               |
| 1691                  | CG→TA         | 8                            | 20                | 2                                        | 18                            |
| 1714                  | AT→CG         |                              |                   | 17                                       | 12                            |
| 1714                  | AT→TA         | 19                           | 53                | 7                                        | 88                            |
| 1715                  | AT→CG         |                              |                   | 2                                        |                               |
| 1716                  | CG→GC         |                              |                   | 5                                        |                               |
|                       | Transitions   | 352 (94%)                    | 290 (77%)         | 36 (12%)                                 | 58 (19%)                      |
|                       | Transversions | 22 (6%)                      | 85 (23%)          | 253 (88%)                                | 252 (81%)                     |
|                       | Total         | 374                          | 375               | 290                                      | 310                           |

<sup>a</sup>: The data are the number of mutants found for each type of base substitution at a particular position

<sup>b</sup>: The numbering system originates from Garibyan *et al.*, [57], where the A of the ATG initiation codon is #1.
